# Supplementary material
Source: PubMed Central journal article supplement (PMC2991212)
Supplement: Supp_Data.pdf [file Supp_Data.pdf]

## Supplementary Material

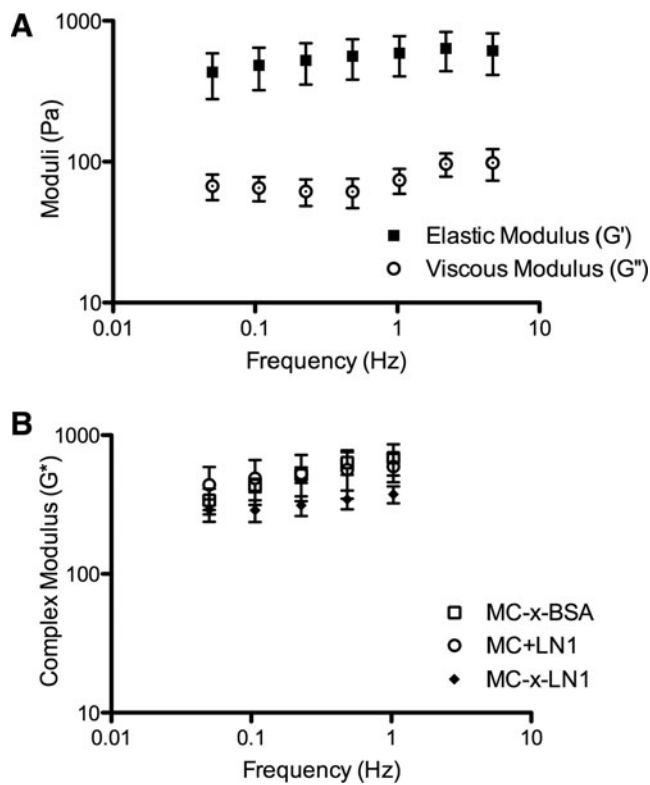

**SUPPLEMENTARY FIG. S1.** Rheological analyses were performed on a Bohlin CVO rheometer (Bohlin) with a parallel plate configuration. To examine the mechanical integrity of the MC hydrogel at physiological temperatures, a frequency sweep from 0.05 to 10 Hz was performed on each sample group ( $n = 6-8$  per group) under constant low amplitude stress (1% strain) upon equilibration to 37°C. **(A)** The elastic ( $G'$ ; ■) and viscous ( $G''$ ; ○) moduli plot against frequency (Hz). **(B)** Complex moduli ( $G^*$ ) of MC formulations used for the neural stem cell cultures plotted against frequency (Hz); MC-x-BSA (□), MC+LN1 (○), and MC-x-LN1 (◆). The complex modulus of the MC hydrogel ranged between 400 and 600 Pa with no statistical difference between groups (analysis of variance,  $p = 0.12$ ). BSA, bovine serum albumin; MC, methylcellulose; LN1, laminin-1.
